# Supplementary material for: A miR-155–Peli1–c-Rel pathway controls the generation and function of T follicular helper cells
Source: PubMed Central journal article supplement — J Exp Med. 2016 Aug 22;213(9):1901–19. doi: 10.1084/jem.20160204 (PMC4995083; doi:10.1084/jem.20160204), 2016-08-22
Supplement: supp_jem.20160204_JEM_20160204_sm.pdf [file supp_jem.20160204_JEM_20160204_sm.pdf]

SUPPLEMENTAL MATERIAL

Liu et al., <http://www.jem.org/cgi/content/full/jem.20160204/DC1>

Table S1. Small RNA deep sequencing analysis of Tfh cells

| miRNA               | Naive CD4 T_rep1 | Naive CD4 T_rep2 | Pre-Tfh_rep1  | Pre-Tfh_rep2  | Tfh_rep1      | Tfh_rep2      |
|---------------------|------------------|------------------|---------------|---------------|---------------|---------------|
| mmu-miR-125a-5p     | 116              | 113              | 85            | 120           | 69            | 108           |
| mmu-miR-139-5p      | 0                | 0                | 77            | 107           | 47            | 76            |
| mmu-miR-142-5p      | 31,296           | 35,845           | 9,983         | 15,626        | 7,162         | 6,948         |
| mmu-miR-151-5p      | 290              | 359              | 71            | 111           | 77            | 96            |
| mmu-miR-1839-5p     | 1,238            | 1,096            | 720           | 664           | 456           | 613           |
| mmu-miR-296-5p      | 35               | 25               | 72            | 79            | 178           | 103           |
| mmu-miR-339-5p      | 84               | 83               | 33            | 40            | 33            | 39            |
| mmu-miR-340-5p      | 439              | 437              | 55            | 61            | 8             | 10            |
| mmu-miR-342-5p      | 1,034            | 1,163            | 550           | 886           | 872           | 817           |
| mmu-miR-345-5p      | 21               | 19               | 16            | 24            | 15            | 19            |
| mmu-miR-423-5p      | 1,607            | 1,521            | 1,171         | 1,544         | 2,171         | 1,517         |
| mmu-miR-466c-5p     | 87               | 96               | 26            | 52            | 0             | 32            |
| mmu-miR-532-5p      | 468              | 410              | 297           | 288           | 207           | 298           |
| mmu-miR-574-5p      | 4                | 0                | 0             | 0             | 14            | 0             |
| mmu-miR-671-5p      | 89               | 82               | 77            | 113           | 127           | 102           |
| mmu-let-7a          | 50,410           | 44,208           | 21,317        | 24,817        | 26,739        | 17,919        |
| mmu-let-7b          | 5,934            | 4,607            | 1,628         | 1,746         | 2,321         | 1,211         |
| mmu-let-7c          | 13,812           | 11,413           | 3,696         | 4,003         | 4,289         | 2,628         |
| mmu-let-7d          | 4,353            | 4,017            | 2,302         | 3,404         | 3,848         | 2,307         |
| mmu-let-7e          | 798              | 750              | 436           | 485           | 554           | 497           |
| mmu-let-7f          | 92,300           | 85,617           | 41,590        | 41,333        | 26,908        | 27,200        |
| mmu-let-7g          | 40,274           | 37,499           | 16,265        | 20,962        | 7,855         | 9,102         |
| mmu-let-7i          | 20,930           | 18,625           | 15,004        | 14,599        | 10,358        | 11,378        |
| mmu-miR-101a        | 1,105            | 1,238            | 285           | 158           | 17            | 73            |
| mmu-miR-103         | 2,680            | 2,309            | 2,782         | 2,680         | 2,356         | 3,162         |
| mmu-miR-106a        | 60               | 67               | 45            | 75            | 21            | 33            |
| mmu-miR-106b        | 643              | 581              | 499           | 553           | 483           | 483           |
| mmu-miR-107         | 413              | 361              | 356           | 334           | 219           | 321           |
| mmu-miR-10a         | 196              | 780              | 2,035         | 1,827         | 232           | 496           |
| mmu-miR-10b         | 5                | 5                | 28            | 15            | 10            | 16            |
| mmu-miR-1198        | 155              | 143              | 114           | 160           | 188           | 129           |
| mmu-miR-128         | 253              | 241              | 95            | 149           | 109           | 92            |
| mmu-miR-130b        | 128              | 100              | 167           | 261           | 277           | 235           |
| mmu-miR-132         | 75               | 82               | 116           | 176           | 118           | 133           |
| mmu-miR-140         | 4,291            | 3,811            | 2,601         | 2,670         | 2,045         | 2,380         |
| mmu-miR-141         | 113              | 119              | 21            | 30            | 8             | 12            |
| <b>mmu-miR-146a</b> | <b>639</b>       | <b>1,280</b>     | <b>15,313</b> | <b>25,300</b> | <b>35,116</b> | <b>24,466</b> |
| mmu-miR-146b        | 187              | 67               | 105           | 379           | 226           | 112           |
| <b>mmu-miR-148a</b> | <b>997</b>       | <b>495</b>       | <b>7,647</b>  | <b>6,561</b>  | <b>10,696</b> | <b>13,349</b> |
| mmu-miR-148b        | 3,136            | 2,242            | 2,005         | 2,109         | 1,969         | 5,068         |
| mmu-miR-150         | 8,682            | 10,027           | 3,386         | 5,105         | 1,592         | 1,671         |
| mmu-miR-152         | 1                | 0                | 8             | 3             | 2             | 5             |
| <b>mmu-miR-155</b>  | <b>875</b>       | <b>1,361</b>     | <b>3,840</b>  | <b>5,724</b>  | <b>3,809</b>  | <b>3,683</b>  |
| mmu-miR-15a         | 242              | 243              | 184           | 251           | 0             | 158           |
| mmu-miR-15b         | 732              | 1,112            | 504           | 854           | 294           | 353           |
| mmu-miR-16          | 9,720            | 12,725           | 7,795         | 14,229        | 7,248         | 9,799         |
| mmu-miR-17          | 259              | 254              | 157           | 239           | 102           | 133           |
| mmu-miR-181a        | 92,587           | 86,300           | 16,380        | 19,924        | 20,923        | 18,450        |
| mmu-miR-181b        | 2,532            | 2,064            | 1,406         | 1,508         | 2,682         | 2,264         |
| mmu-miR-181c        | 4,324            | 3,642            | 438           | 727           | 107           | 154           |
| mmu-miR-181d        | 585              | 433              | 158           | 228           | 75            | 91            |
| <b>mmu-miR-182</b>  | <b>276</b>       | <b>257</b>       | <b>2,795</b>  | <b>3,252</b>  | <b>4,901</b>  | <b>4,103</b>  |
| mmu-miR-183         | 14               | 10               | 122           | 172           | 186           | 213           |
| mmu-miR-185         | 63               | 69               | 82            | 102           | 75            | 87            |
| mmu-miR-186         | 656              | 671              | 464           | 806           | 469           | 562           |
| mmu-miR-18a         | 28               | 28               | 26            | 45            | 29            | 28            |
| mmu-miR-191         | 4,401            | 4,384            | 6,127         | 10,724        | 12,360        | 10,758        |
| mmu-miR-192         | 1,167            | 1,028            | 480           | 604           | 359           | 389           |
| mmu-miR-196a        | 0                | 0                | 0             | 1             | 0             | 0             |
| mmu-miR-1981        | 27               | 22               | 49            | 50            | 91            | 70            |
| mmu-miR-19a         | 114              | 130              | 52            | 40            | 8             | 22            |
| mmu-miR-19b         | 1,403            | 1,483            | 502           | 433           | 88            | 193           |
| mmu-miR-200a        | 241              | 232              | 30            | 32            | 1             | 8             |

Table S1. Small RNA deep sequencing analysis of Tfh cells (Continued)

| miRNA             | Naive CD4 T_rep1 | Naive CD4 T_rep2 | Pre-Tfh_rep1 | Pre-Tfh_rep2 | Tfh_rep1     | Tfh_rep2     |
|-------------------|------------------|------------------|--------------|--------------|--------------|--------------|
| mmu-miR-200c      | 111              | 107              | 49           | 77           | 58           | 43           |
| mmu-miR-203       | 189              | 184              | 104          | 111          | 27           | 39           |
| mmu-miR-20a       | 344              | 332              | 173          | 247          | 74           | 108          |
| mmu-miR-20b       | 161              | 162              | 84           | 134          | 40           | 55           |
| mmu-miR-21        | 41,176           | 41,744           | 17,5510      | 149,440      | 80,756       | 110,570      |
| mmu-miR-210       | 6                | 4                | 24           | 23           | 57           | 59           |
| mmu-miR-211       | 58               | 73               | 32           | 79           | 24           | 30           |
| mmu-miR-212       | 9                | 12               | 20           | 34           | 25           | 21           |
| <b>mmu-miR-22</b> | <b>1,475</b>     | <b>1,468</b>     | <b>3,368</b> | <b>4,942</b> | <b>4,627</b> | <b>4,532</b> |
| mmu-miR-221       | 106              | 95               | 502          | 589          | 696          | 729          |
| mmu-miR-222       | 23               | 16               | 161          | 174          | 418          | 354          |
| mmu-miR-23b       | 120              | 143              | 104          | 181          | 59           | 79           |
| mmu-miR-24        | 1,133            | 1,228            | 1,327        | 2,060        | 962          | 1,454        |
| mmu-miR-25        | 12,973           | 11,788           | 6,948        | 7,384        | 5,522        | 6,532        |
| mmu-miR-26a       | 16,065           | 17,807           | 7,954        | 10,841       | 5,672        | 6,684        |
| mmu-miR-26b       | 21,018           | 22,431           | 7,469        | 8,545        | 2,367        | 3,550        |
| mmu-miR-27a       | 0                | 164              | 310          | 335          | 160          | 304          |
| mmu-miR-27b       | 9,135            | 9,473            | 5,576        | 8,616        | 3,150        | 3,680        |
| mmu-miR-28        | 1,439            | 1,231            | 330          | 414          | 239          | 242          |
| mmu-miR-298       | 26               | 14               | 172          | 225          | 379          | 279          |
| mmu-miR-29a       | 827              | 1,095            | 464          | 563          | 190          | 319          |
| mmu-miR-29b       | 43               | 67               | 25           | 25           | 4            | 18           |
| mmu-miR-301a      | 34               | 33               | 114          | 133          | 82           | 122          |
| mmu-miR-301b      | 2                | 2                | 11           | 13           | 11           | 15           |
| mmu-miR-30a       | 555              | 486              | 84           | 92           | 70           | 72           |
| mmu-miR-30b       | 640              | 812              | 306          | 462          | 133          | 228          |
| mmu-miR-30c       | 966              | 1,204            | 826          | 1,323        | 734          | 948          |
| mmu-miR-30d       | 8,643            | 8,776            | 3,991        | 5,408        | 3,757        | 4,065        |
| mmu-miR-30e       | 0                | 0                | 2,924        | 2,956        | 1,403        | 2,011        |
| mmu-miR-31        | 12               | 14               | 136          | 245          | 237          | 194          |
| mmu-miR-320       | 565              | 438              | 353          | 401          | 620          | 421          |
| mmu-miR-326       | 0                | 0                | 0            | 0            | 0            | 0            |
| mmu-miR-34a       | 9                | 11               | 9            | 10           | 1            | 3            |
| mmu-miR-351       | 13               | 9                | 11           | 25           | 15           | 10           |
| mmu-miR-361       | 457              | 452              | 213          | 313          | 175          | 219          |
| mmu-miR-363       | 67               | 81               | 60           | 113          | 69           | 62           |
| mmu-miR-374       | 47               | 59               | 53           | 74           | 27           | 45           |
| mmu-miR-378       | 10,580           | 8,777            | 6,049        | 6,561        | 6,884        | 5,953        |
| mmu-miR-421       | 0                | 0                | 0            | 0            | 0            | 0            |
| mmu-miR-425       | 394              | 443              | 302          | 558          | 448          | 350          |
| mmu-miR-449a      | 11               | 11               | 13           | 16           | 9            | 11           |
| mmu-miR-466j      | 0                | 0                | 0            | 105          | 89           | 0            |
| mmu-miR-467b      | 153              | 0                | 0            | 0            | 0            | 0            |
| mmu-miR-467d      | 146              | 175              | 34           | 55           | 32           | 26           |
| mmu-miR-467e      | 220              | 237              | 39           | 72           | 32           | 31           |
| mmu-miR-486       | 88               | 76               | 145          | 289          | 189          | 167          |
| mmu-miR-541       | 1                | 2                | 68           | 69           | 0            | 0            |
| mmu-miR-669c      | 2,124            | 1,556            | 512          | 545          | 852          | 472          |
| mmu-miR-669f      | 288              | 278              | 72           | 111          | 93           | 64           |
| mmu-miR-669o      | 0                | 0                | 0            | 0            | 0            | 0            |
| mmu-miR-720       | 624              | 641              | 456          | 545          | 812          | 498          |
| mmu-miR-7a        | 5,137            | 4,374            | 3,144        | 3,091        | 1,826        | 2,185        |
| mmu-miR-92a       | 51,613           | 43,488           | 15,742       | 20,704       | 15,406       | 10,948       |
| mmu-miR-92b       | 218              | 231              | 424          | 549          | 351          | 340          |
| mmu-miR-93        | 3,199            | 3,024            | 1,868        | 2,312        | 1,409        | 1,619        |
| mmu-miR-96        | 2                | 2                | 7            | 11           | 7            | 9            |
| mmu-miR-98        | 2,197            | 1,980            | 1,812        | 1,881        | 1,453        | 1,461        |
| mmu-miR-99b       | 102              | 66               | 69           | 71           | 0            | 0            |

Numbers are normalized sequencing reads in units of tags per million. Bold rows indicate miRNA signature of Tfh cells.
